# Supplementary material for: A highly stretchable strain sensor based on electrospun carbon nanofibers for human motion monitoring
Source: Royal Society of Chemistry journal article supplement (doi:10.1039/c6ra16236c), 2016-01-01
Supplement: c6ra16236c4.pdf [file c6ra16236c4.pdf]

Supplementary information:

## Highly Stretchable Strain Sensor Based on Electrospun Carbon Nanofibers for Human Motion Monitoring

Yichun Ding,<sup>a</sup> Jack Yang,<sup>b</sup> Charles R. Tolle,<sup>b,c</sup> and Zhengtao Zhu<sup>a,d\*</sup>

<sup>a</sup> Biomedical Engineering PhD Program, South Dakota School of Mines and Technology, Rapid City, SD, 57701, USA.

<sup>b</sup> Materials Engineering and Science PhD Program, South Dakota School of Mines and Technology, Rapid City, SD, 57701, USA.

<sup>c</sup> Department of Electrical Engineering, South Dakota School of Mines and Technology, Rapid City, SD, 57701, USA.

<sup>d</sup> Department of Chemistry and Applied Biological Sciences, South Dakota School of Mines and Technology, Rapid City, SD, 57701, USA. E-mail: Zhengtao.Zhu@sdsmt.edu.

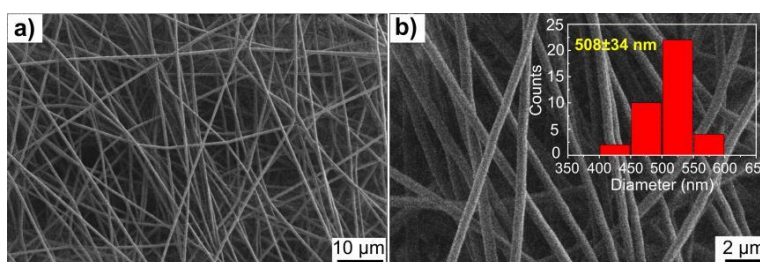

Fig. S1 SEM images of the electrospun PAN nanofibers.

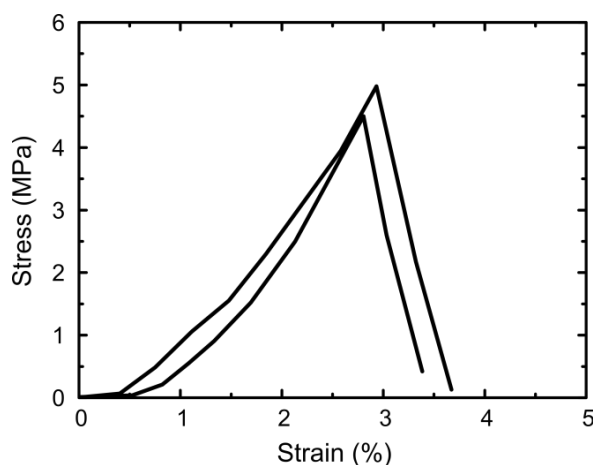

Fig.S2 Stress-strain curves of CNFs mat.

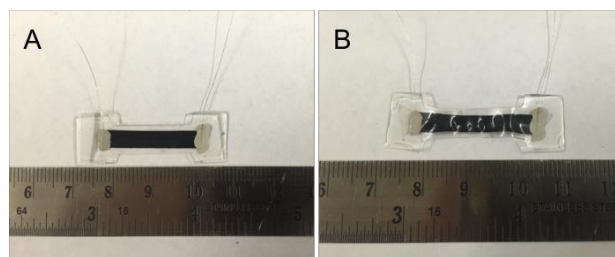

**Fig.S3** Optical images of strain sensor when unstretched (A) and after stretched for 350% strain (B).

**Table.S1.** Comparison of the performance of strain sensors in this work and in other reported works. The references are selected based on the materials and/or processes for strain sensors reported in recent years.

| Materials                            | Prepare/assembly method                  | Stretchability | Gauge factor | Cycles      | Reference        |
|--------------------------------------|------------------------------------------|----------------|--------------|-------------|------------------|
| Ag nanoparticles                     | transfer ink patterning                  | 20%            | 2.05         | 1000        | 1                |
| Ag nanowires                         | drop casting                             | 70%            | 2-14         | -           | 2                |
| PANI/Au nanowire                     | Chinese penbrush writing                 | 100%           | 13           | 10000       | 3                |
| Si nanowires                         | vapor-liquid-solid process               | 50%            | 350          | ~500        | 4                |
| Carbon nanotubes                     | dry-spun                                 | 900%           | 64           | 10000       | 5                |
|                                      | layer-by-layer drop casting              | 100%           | 62.7         | 1000        | 6                |
|                                      | drop at surface                          | 530%           | 12-25        | 1000        | 7                |
| graphene                             | soaking                                  | 800%           | 35           | 1000        | 8                |
|                                      | layer-by-layer assembly                  | 150%           | -            | -           | 9                |
|                                      | embedding                                | 100%           | 7.1          | -           | 10               |
| <b>Electrospun carbon nanofibers</b> | <b>Electrospinning &amp; sandwiching</b> | <b>300%</b>    | <b>72</b>    | <b>8000</b> | <b>This work</b> |

#### Reference

1. J. Lee, S. Kim, J. Lee, D. Yang, B. C. Park, S. Ryu and I. Park, *Nanoscale*, 2014, **6**, 11932-11939.
2. M. Amjadi, A. Pichitpajongkit, S. Lee, S. Ryu and I. Park, *ACS Nano*, 2014, **8**, 5154-5163.
3. S. Gong, D. T. H. Lai, Y. Wang, L. W. Yap, K. J. Si, Q. Shi, N. N. Jason, T. Sridhar, H. Uddin and W. Cheng, *ACS Applied Materials & Interfaces*, 2015, **7**, 19700-19708.
4. B.-C. Zhang, H. Wang, Y. Zhao, F. Li, X.-M. Ou, B.-Q. Sun and X.-H. Zhang, *Nanoscale*, 2016, **8**, 2123-2128.
5. S. Ryu, P. Lee, J. B. Chou, R. Xu, R. Zhao, A. J. Hart and S.-G. Kim, *ACS Nano*, 2015, **9**, 5929-5936.

6. E. Roh, B.-U. Hwang, D. Kim, B.-Y. Kim and N.-E. Lee, *ACS Nano*, 2015, **9**, 6252-6261.
7. M. A. Darabi, A. Khosrozadeh, Q. Wang and M. Xing, *ACS Applied Materials & Interfaces*, 2015, **7**, 26195-26205.
8. C. S. Boland, U. Khan, C. Backes, A. O'Neill, J. McCauley, S. Duane, R. Shanker, Y. Liu, I. Jurewicz, A. B. Dalton and J. N. Coleman, *ACS Nano*, 2014, **8**, 8819-8830.
9. J. J. Park, W. J. Hyun, S. C. Mun, Y. T. Park and O. O. Park, *ACS Applied Materials & Interfaces*, 2015, **7**, 6317-6324.
10. C. Yan, J. Wang, W. Kang, M. Cui, X. Wang, C. Y. Foo, K. J. Chee and P. S. Lee, *Advanced Materials*, 2014, **26**, 2022-2027.
